# Supplementary material
Source: Royal Society of Chemistry journal article supplement (doi:10.1039/d5su00815h)

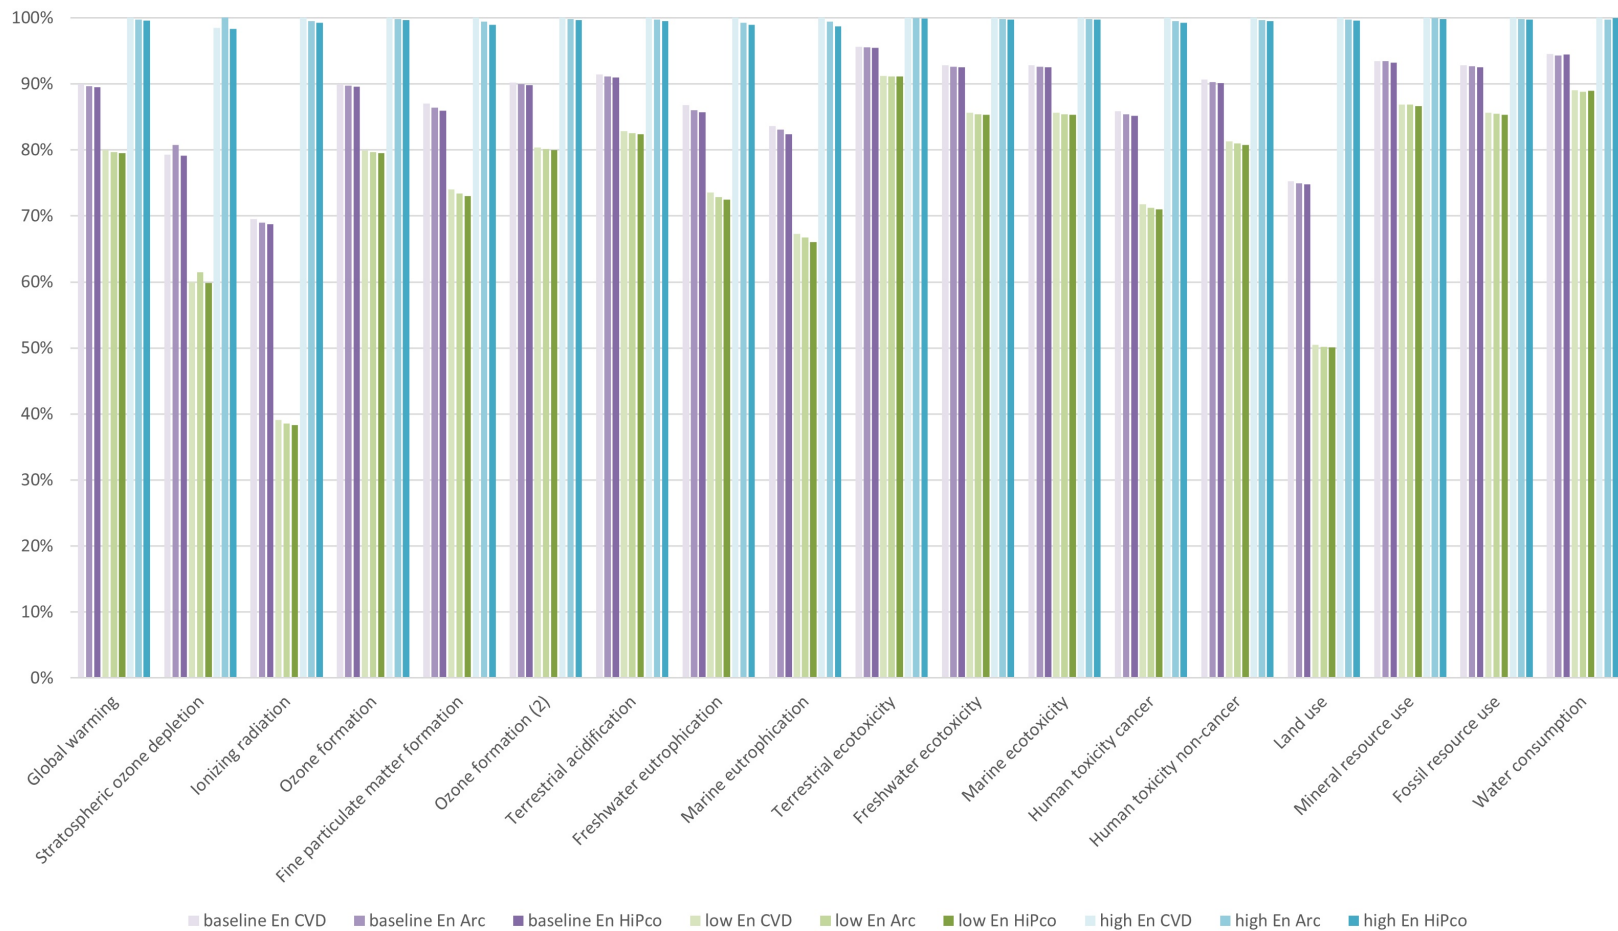

Supplement: d5su00815h1.pdf [file d5su00815h1.pdf]

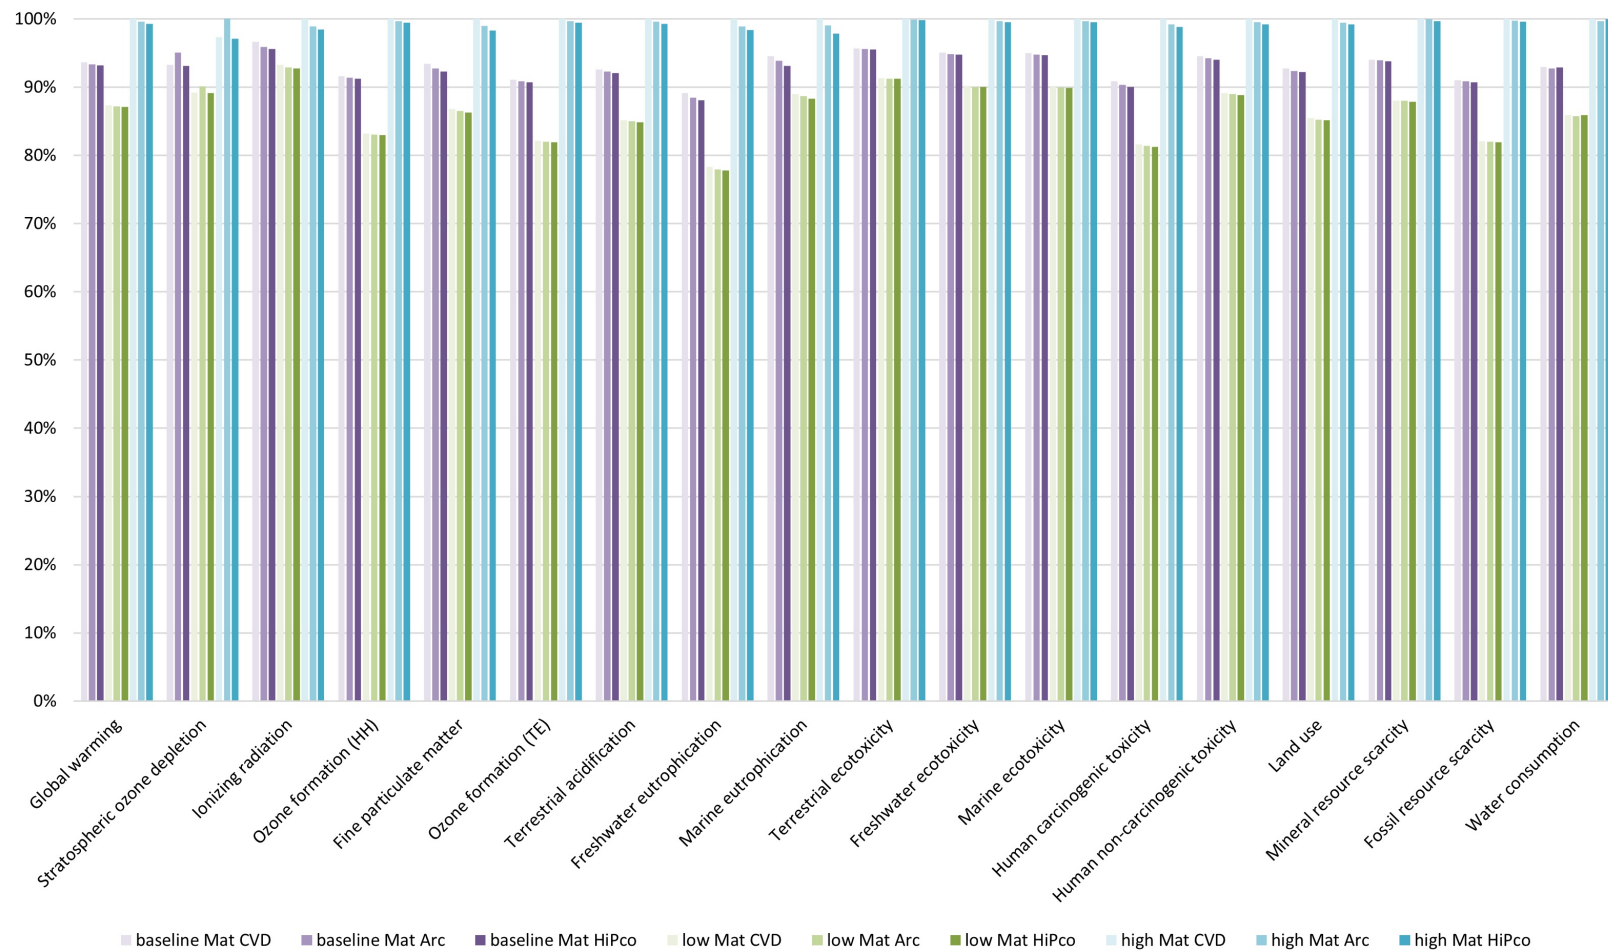

Supplement: d5su00815h2.pdf [file d5su00815h2.pdf]
